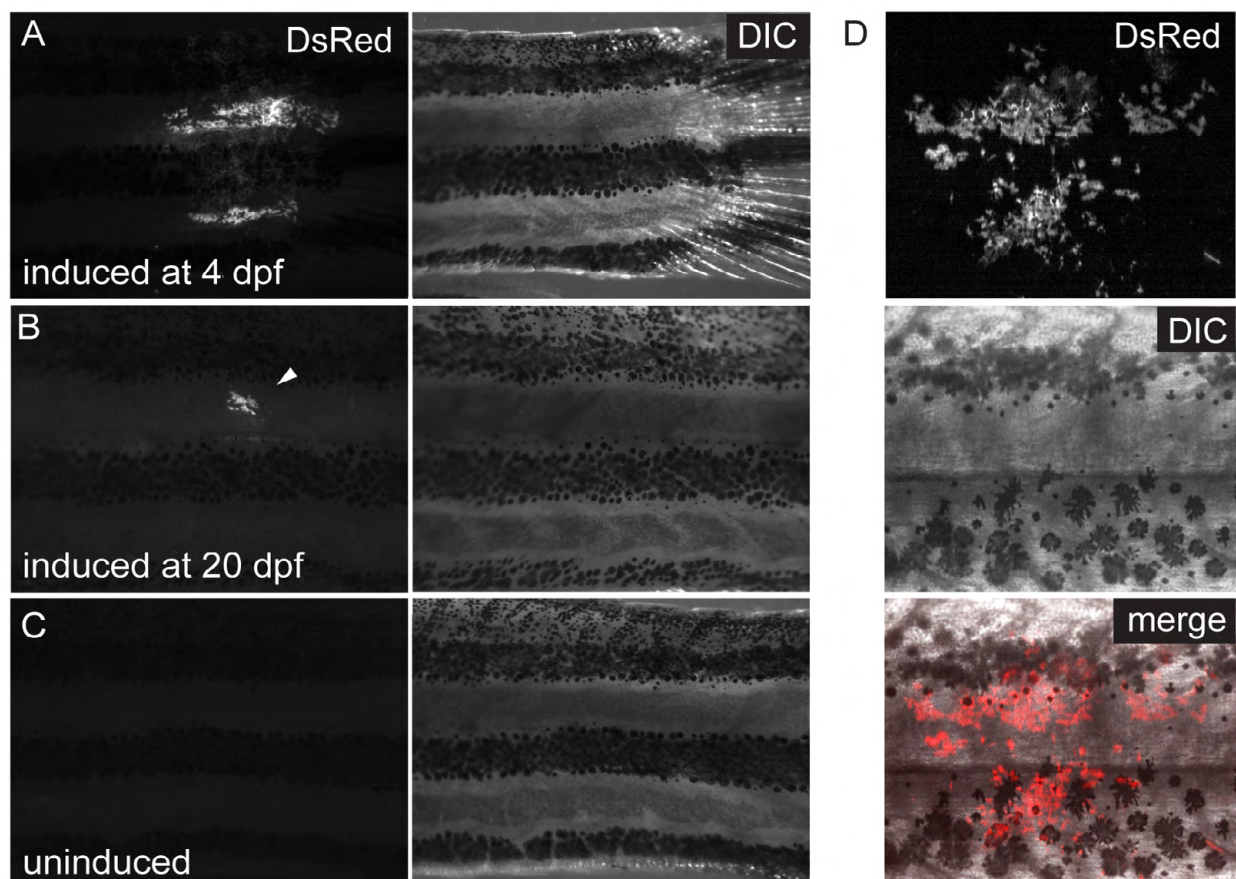

**Fig. S1. Control of postembryonic Cre induction.** (A-C) Epifluorescent acquisitions and brightfield images. (A) Pigment cell clones in adult fish induced at 4 dpf and (B) 20 dpf (arrowhead). (C) Trunk of uninduced adult fish devoid of clones. (D) MIP of confocal stacks showing labeled melanophores and iridophores on the adult fish flank.

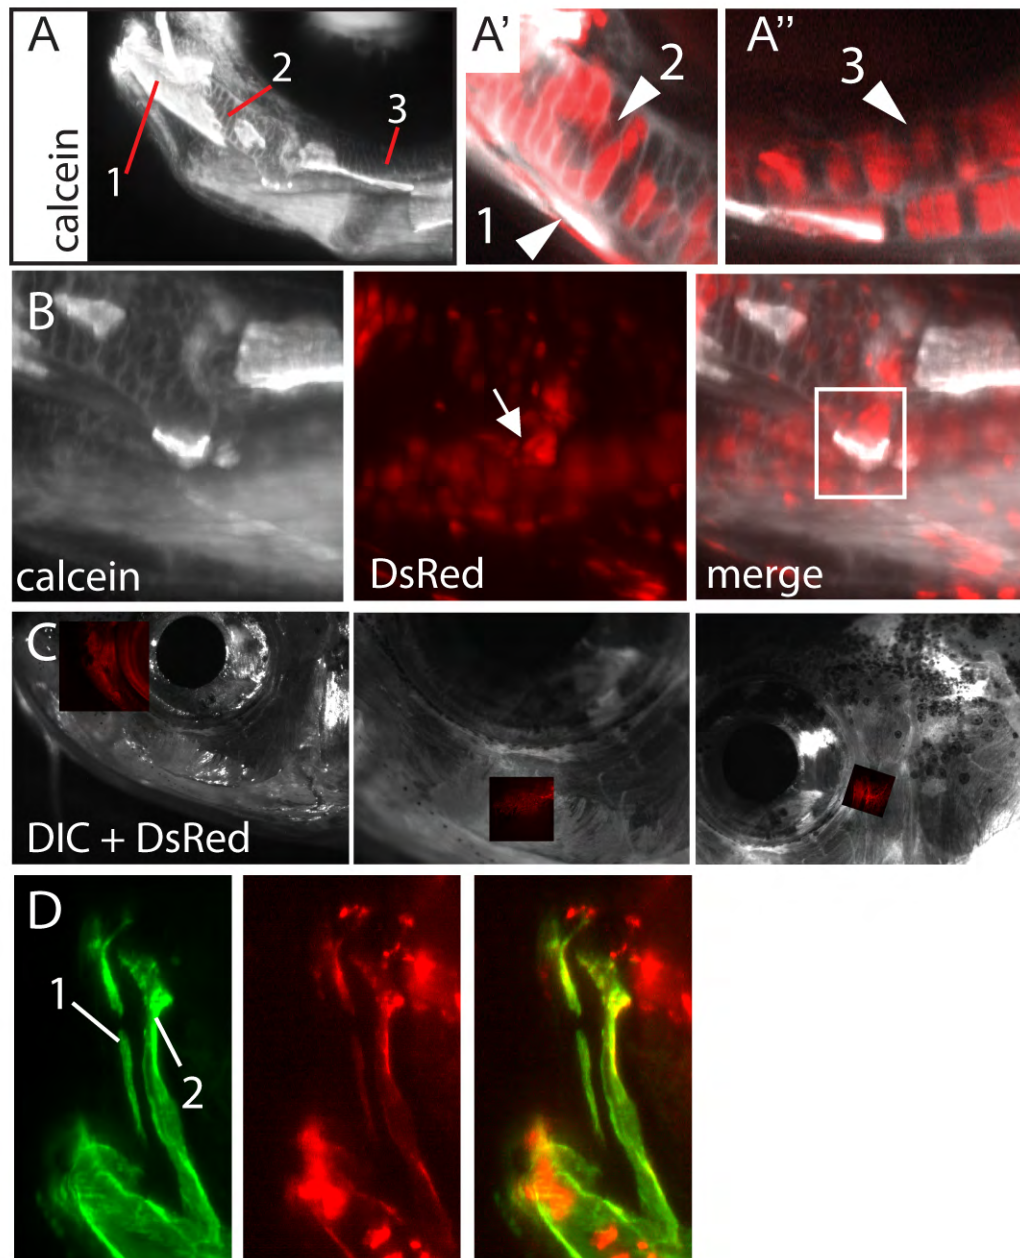

**Fig. S2. Examples of NC-derived structures detectable *in vivo* in metamorphic and adult fish.** (A-D) Induced *Tg(sox10:ER<sup>T2</sup>-Cre;β-actin:switch)* metamorphic and adult fish stained with calcein. (A-A'') 20-dpf fish with labeled dentary (A', 1), Meckel's cartilage (A', 2) and palatoquadrate (A'', 3). (B) 20-dpf fish with labeled retroarticular bone (arrow). (C) Labeled circumorbital bones. (D) Labeled pre-maxilla (1) and maxilla (2).

bactin:switch;crestin:gal4-UAS:GFP+UAS:CRE

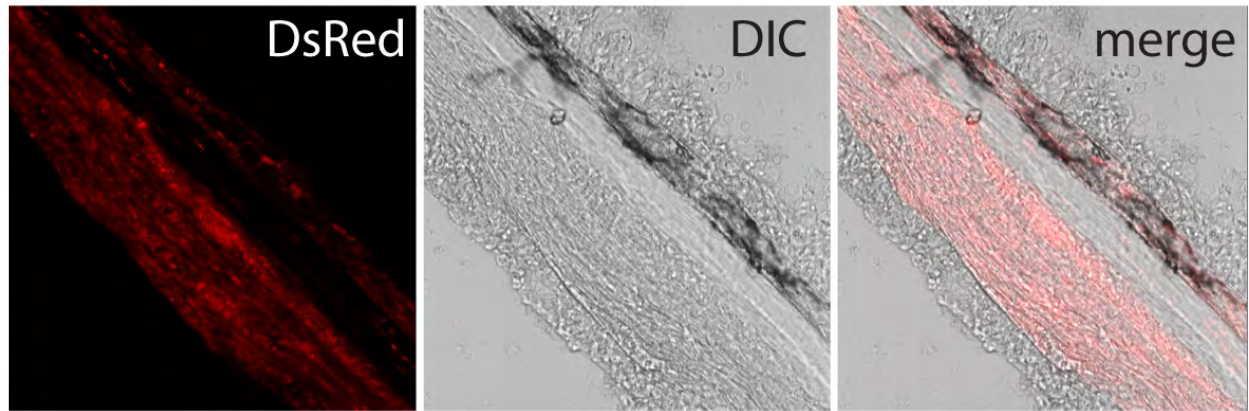

**Fig. S3.** Recombined tissues in barbels of adult *Tg(crestin:gal4-UAS:GFP; $\beta$ -actin:switch)* fish injected at the 1-cell stage with *UAS:Cre* DNA.
